# Supplementary material
Source: Springer Nature journal article supplement (https://www.springermedizin.de/resource/supplementary/12982_2007_55_MOESM1_ESM.pdf/9604410)

## 1. PCA-based index

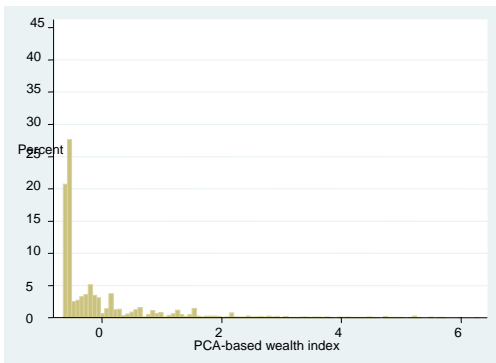

## 2. PCA-based index using binary variables

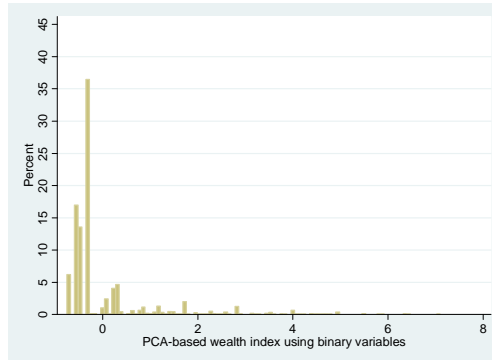

## 3. Equal weights

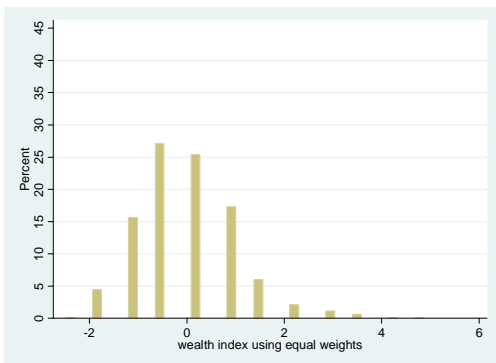

## 4. Inverse proportion

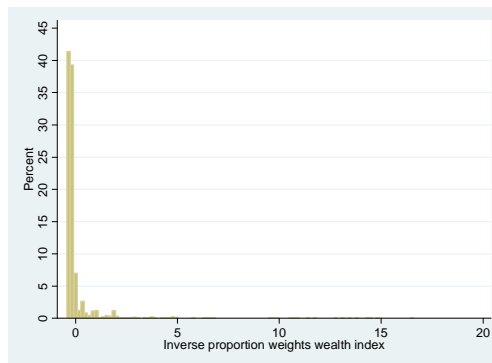

## 5. MCA

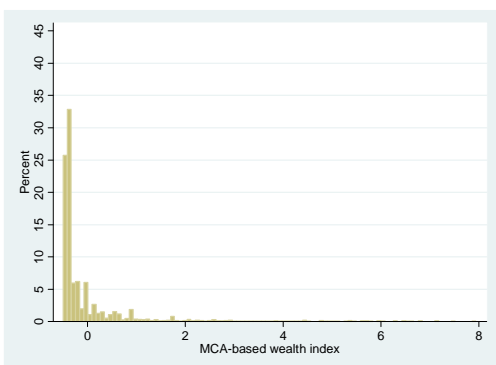

Supplement: MOESM1 [file 9604410]
